# Supplementary material for: Two orders of magnitude enhancement in oxygen evolution reactivity on amorphous Ba0.5Sr0.5Co0.8Fe0.2O3−δ nanofilms with tunable oxidation state
Source: PubMed Central journal article supplement — Sci Adv. 2017 Jun 21;3(6):e1603206. doi: 10.1126/sciadv.1603206 (PMC5479656; doi:10.1126/sciadv.1603206), 2017-06-21
Supplement: 1603206_SM.pdf [file 1603206_SM.pdf]

## Supplementary Materials for

### Two orders of magnitude enhancement in oxygen evolution reactivity on amorphous $\text{Ba}_{0.5}\text{Sr}_{0.5}\text{Co}_{0.8}\text{Fe}_{0.2}\text{O}_{3-\delta}$ nanofilms with tunable oxidation state

Gao Chen, Wei Zhou, Daqin Guan, Jaka Sunarso, Yanping Zhu, Xuefeng Hu, Wei Zhang, Zongping Shao

Published 21 June 2017, *Sci. Adv.* **3**, e1603206 (2017)

DOI: 10.1126/sciadv.1603206

#### The PDF file includes:

- fig. S1. Powder XRD patterns of the crystalline BSCF perovskite target.
- fig. S2. Surface morphology obtained by AFM on the top of Ni foil.
- fig. S3. SEM image of the amorphous BSCF nanofilm and the respective energy-dispersive x-ray spectrum.
- fig. S4. SEM images of the film/substrate interface on the top of silicon wafer.
- fig. S5. Basic characterizations and OER activity of bulk  $\text{IrO}_2$ .
- fig. S6. Tafel slopes for mass activities of amorphous BSCF on Ni foil substrates.
- fig. S7. Ni 2p XPS.
- fig. S8. XPS and OER results of reduced Ni-based nanofilms.
- fig. S9. OER activities of Ni oxide-based nanofilms.
- fig. S10. XPS results of ITO-based nanofilms.
- fig. S11. Mass activities for BSCF-ITO heterostructures.
- fig. S12. Tafel plots.
- fig. S13. Stability tests of nanofilms.
- fig. S14. Stability tests of Ni foil and Ni foam.
- fig. S15. OER activity for the 38.7 and 154.8  $\mu\text{g cm}^{-2}$  BSCF-Ni foam heterostructure electrodes in a 1.0 M KOH solution.
- fig. S16. Photograph of a water-splitting device.
- table S1. Comparison of the mass activities of the thin-film heterostructures to other recently reported catalysts for the OER in an alkaline solution.
- table S2. Comparison of the overpotentials to obtain 10  $\text{mA cm}^{-2}_{\text{film}}$  for the ITO-based heterostructures and the Ni foil-based heterostructures.

- table S3. Comparison of the performance of the water-splitting catalysts in a 1.0 M KOH solution.
- Legend for movie S1
- References (33–47)

**Other Supplementary Material for this manuscript includes the following:**  
(available at [advances.sciencemag.org/cgi/content/full/3/6/e1603206/DC1](https://advances.sciencemag.org/cgi/content/full/3/6/e1603206/DC1))

- movie S1 (.mp4 format). Video of a water-splitting device.

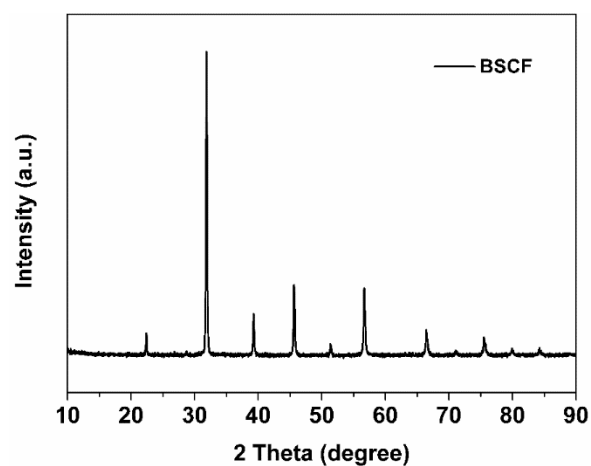

fig. S1. Powder XRD patterns of the crystalline BSCF perovskite target.

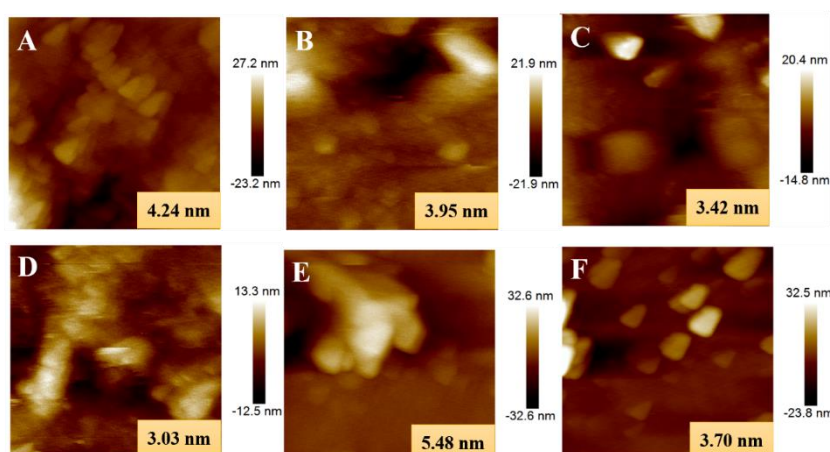

fig. S2. Surface morphology obtained by AFM on the top of Ni foil. (A) Substrate, (B) 1 nm, (C) 5 nm, (D) 10 nm, (E) 15 nm and (F) 20 nm thick BSCF nanofilm. The inset numbers correspond to the surface roughness (in nm).

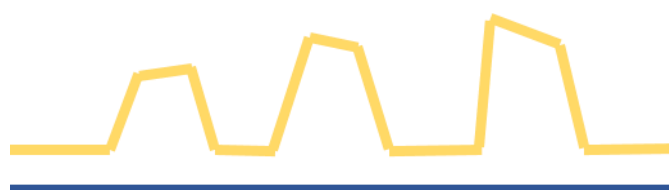

The blue line indicates the AFM scan area while the yellow line represents the three-dimensional (3-D) surface of the entire AFM area. The 3-D surface area was obtained by triangulation of neighboring pixels. This value is derived from the AFM data analyzed by NanoScope Analysis. The surface calibration factor was calculated from the 3-D surface area divided by the AFM scan area. (Ref. 15)

To obtain the intrinsic activities, the surface areas of the thin films were corrected to the 3-D surface of the entire AFM area. The surface areas of Ni foil and Ni-based 1-20 nm thin films should be multiplied by 1.04, 1.05, 1.02, 1.03, 1.06, and 1.03. The ITO-based 1-15 nm thin films should be multiplied by 1.03, 1.02, 1.03, 1.01, and 1.02.

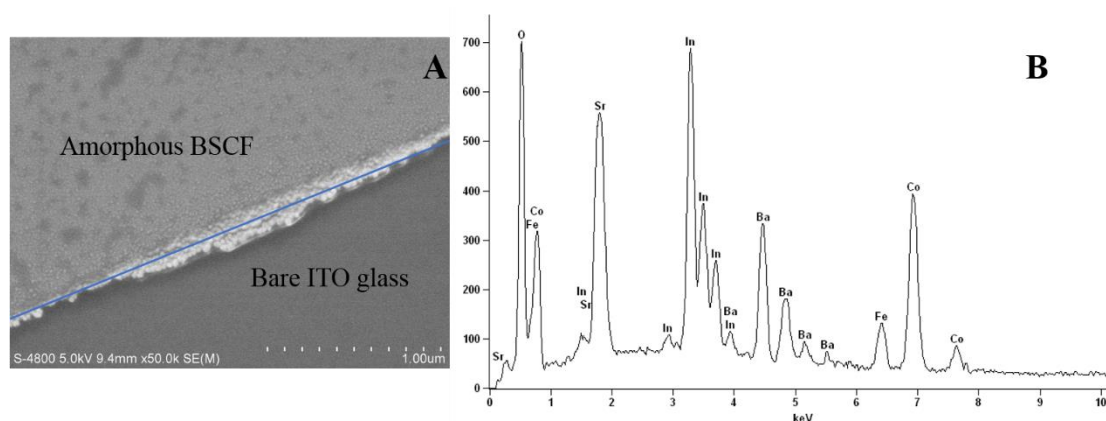

**fig. S3. SEM image of the amorphous BSCF nanofilm and the respective energy-dispersive x-ray spectrum.**

The energy dispersive X-ray spectrum indicates a Ba: Sr: Co: Fe ratio of 0.35: 0.5: 0.81: 0.23, which is close to the target Ba: Sr: Co: Fe stoichiometric ratio of 0.5: 0.5: 0.8: 0.2.

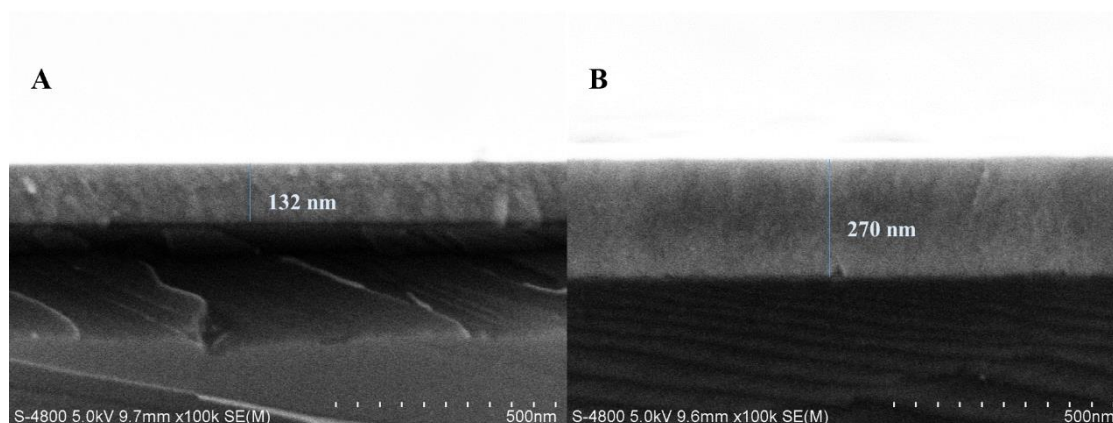

**fig. S4. SEM images of the film/substrate interface on the top of silicon wafer. (A) 100 nm and (B) 200 nm amorphous BSCF thin film.**

The scanning electron images indicate that the thicknesses are 132 nm and 270 nm for 100 nm and 200 nm amorphous BSCF, respectively. The real BSCF thickness should be approximately 1.34 times that of the target thickness. For simplicity, we use the target thickness to label the samples.

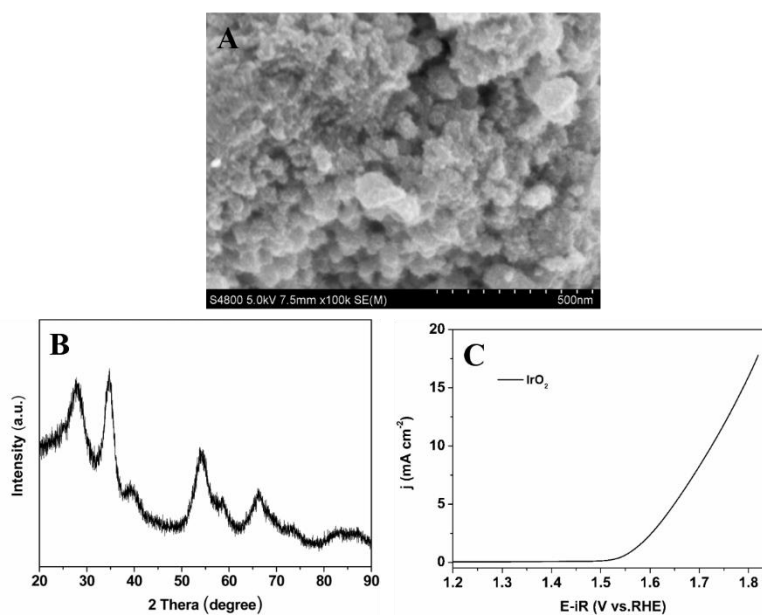

**fig. S5. Basic characterizations and OER activity of bulk IrO<sub>2</sub>.** (A) SEM image and (B) Powder XRD pattern of IrO<sub>2</sub>; (C) Geometric electrode area normalized OER activity for the bulk IrO<sub>2</sub> catalyst obtained from a traditional RDE test at 1600 rpm.

The IrO<sub>2</sub> (99.99% purity, surface area of 139.8 m<sup>2</sup> g<sup>-1</sup>) catalyst was purchased from Aladdin Industrial Corporation. The particle size varies from ~60 nm to above 100 nm. The powder XRD pattern displays a tetragonal structure (space group: P42/mmm, JCPDS No. 15-0870).

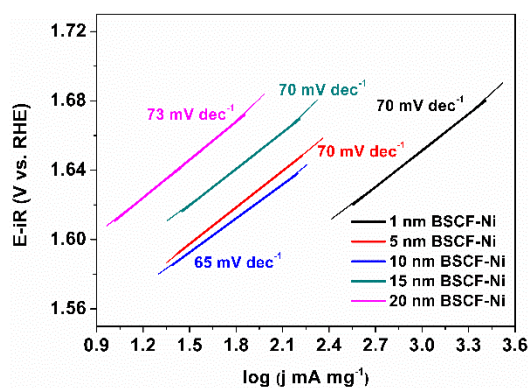

**fig. S6. Tafel slopes for mass activities of amorphous BSCF on Ni foil substrates.**

The Tafel slope values are consistent with the intrinsic activities' values.

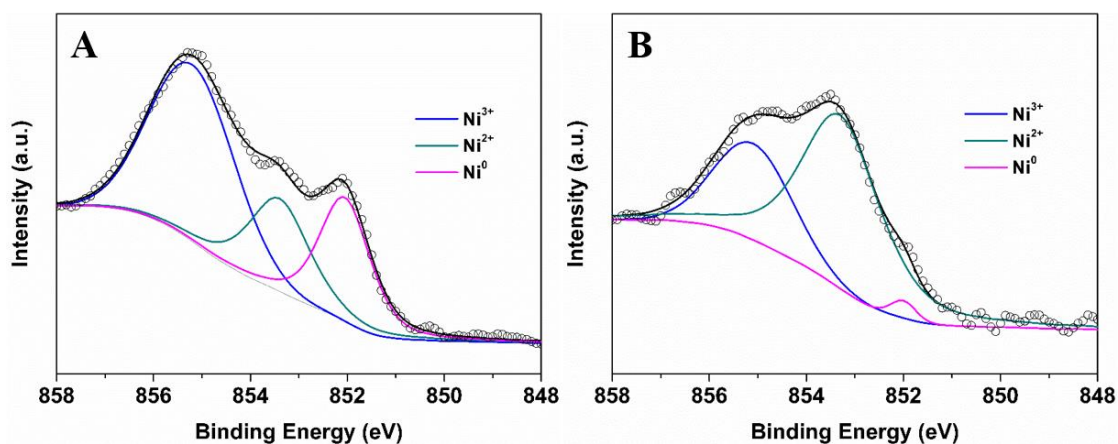

fig. S7. Ni 2p XPS. (A) Ni foil and (B) 1 nm BSCF-Ni foil heterostructure.

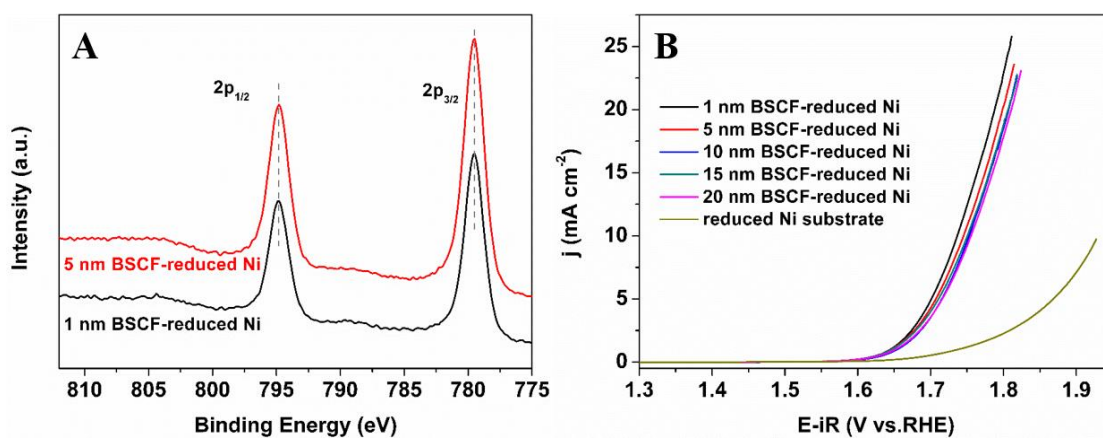

fig. S8. XPS and OER results of reduced Ni-based nanofilms. (A) Co 2p X-ray photoelectron spectra for the 1 nm and 5 nm thick BSCF-reduced Ni foil heterostructures. (B) Geometric electrode area normalized OER activities for the reduced Ni-based BSCF films.

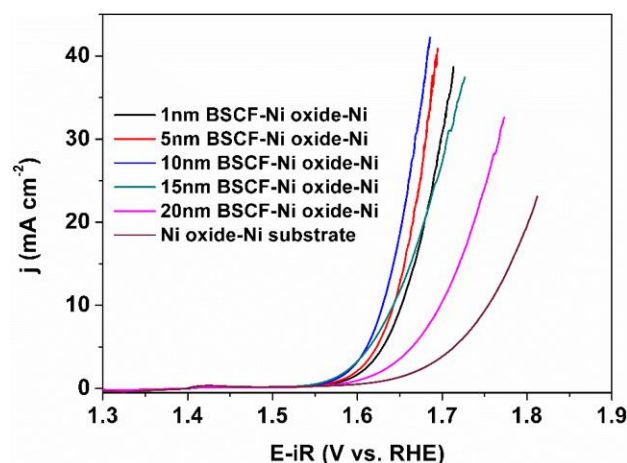

**fig. S9. OER activities of Ni oxide-based nanofilms.** Geometric electrode area normalized OER activities for the 1, 5, 10, 15 and 20 nm BSCF-Ni oxide-Ni foil heterostructures. The data for Ni oxide-Ni substrate are also included. The overpotentials to achieve  $10 \text{ mA cm}^{-2}$  for the 1-20 nm BSCF-Ni oxide-Ni foil heterostructures were 0.42, 0.41, 0.4, 0.41, and 0.47 V. The 10 nm Ni oxide-Ni foil requires an overpotential of 0.52 V, which is substantially larger than those required by the BSCF thin films.

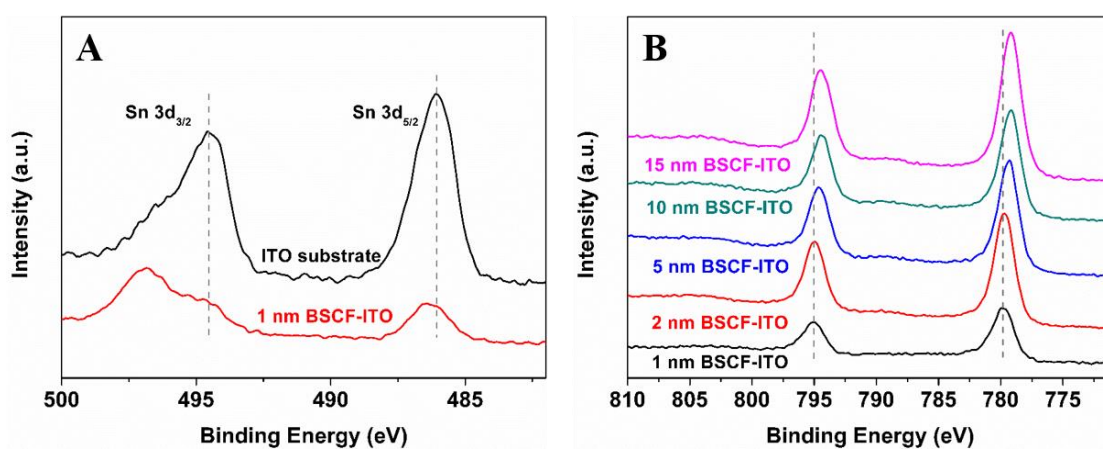

**fig. S10. XPS results of ITO-based nanofilms.** (A) Sn 3d X-ray photoelectron spectra for the 1 nm BSCF-ITO heterostructure and the ITO substrate. (B) Co 2p X-ray photoelectron spectra for the 1 nm, 2 nm, 5 nm, 10 nm, and 15 nm thick BSCF-ITO heterostructures.

The reduced oxidation state of the Sn ion in the ITO substrate and the shift in the Co 2p spectra of the BSCF thin films reveal the tunability of the transition metal ion in the ITO-based heterostructures.

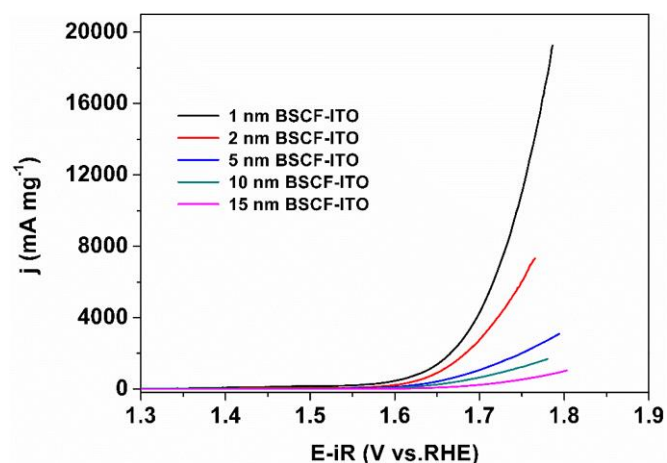

**fig. S11. Mass activities for BSCF-ITO heterostructures.**

The mass activities of the 1-15 nm ITO-based heterostructures at an overpotential of 0.5 V are 7810, 4548, 1618, 986 and 399 mA mg<sup>-1</sup>. The mass activity of the ITO-based heterostructure is slightly lower than that of the Ni foil-based heterostructure at an identical mass loading (not including the 2 nm BSCF-ITO heterostructure).

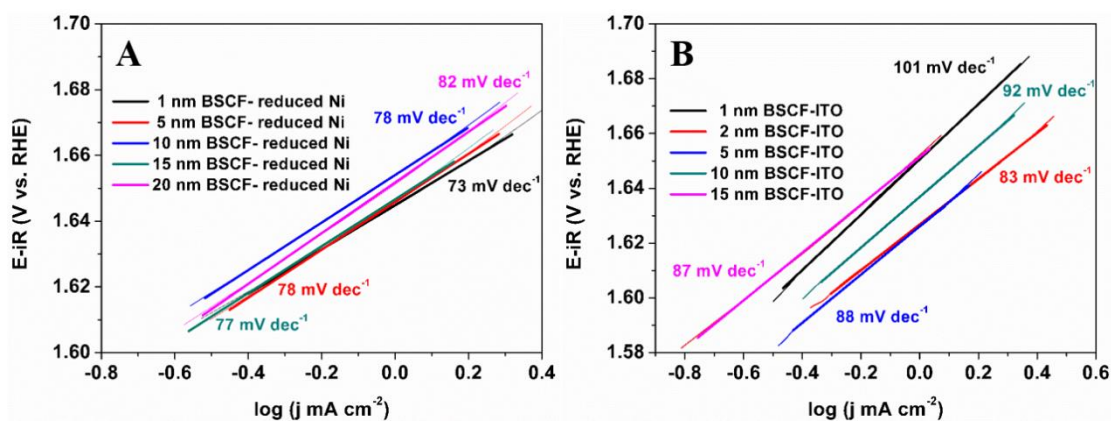

**fig. S12. Tafel plots.** (A) the 1, 5, 10, 15, and 20 nm BSCF-reduced Ni foil heterostructures and (B) 1, 2, 5, 10, and 15 nm BSCF-ITO glass heterostructures.



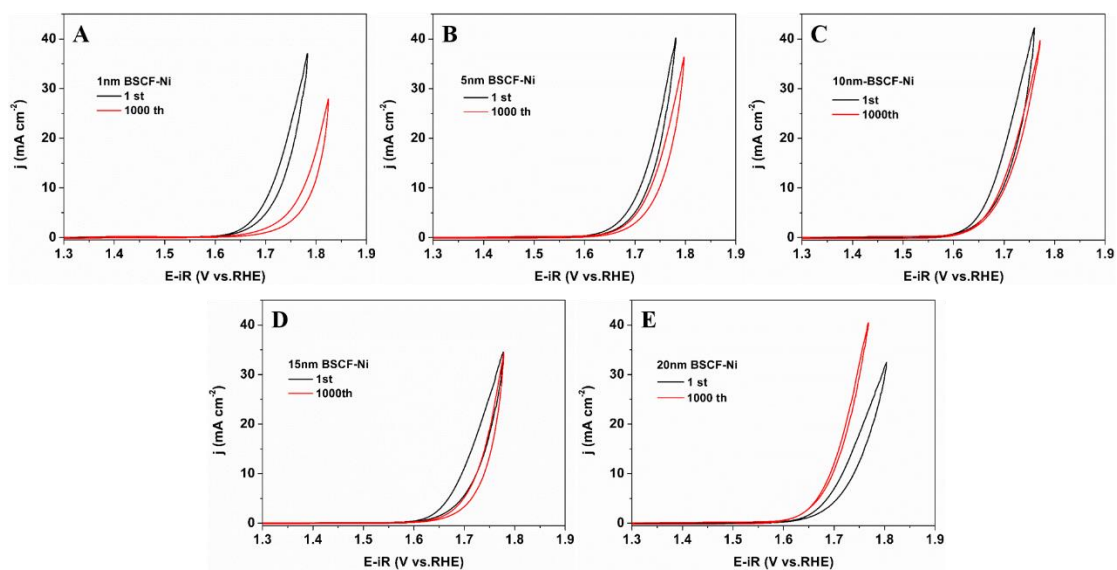

**fig. S13. Stability tests of nanofilms.** Current-potential profile at the 1<sup>st</sup> and 1,000<sup>th</sup> cycles for the (A) 1 nm, (B) 5 nm, (C) 10 nm, (D) 15 nm, and (E) 20 nm BSCF-Ni foil heterostructures electrodes.

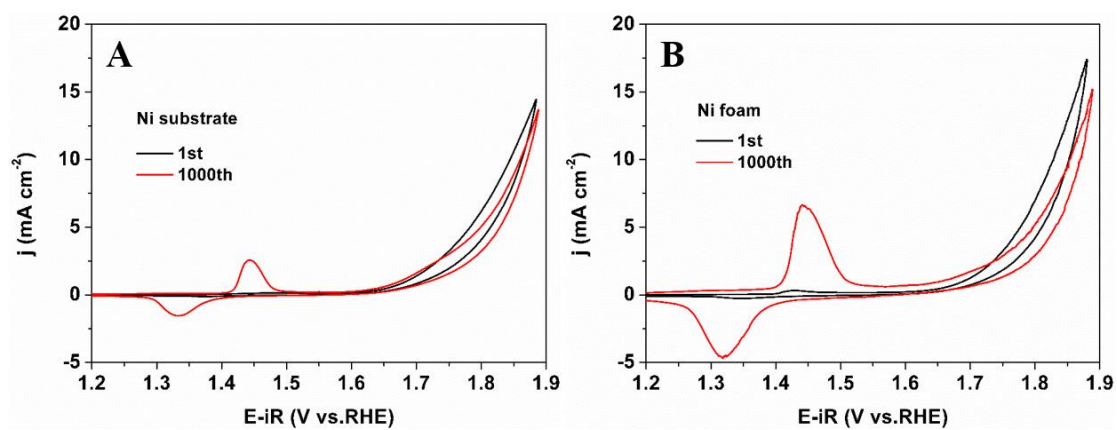

**fig. S14. Stability tests of Ni foil and Ni foam.** Current-potential profile at the 1<sup>st</sup> and 1,000<sup>th</sup> cycles for the (A) Ni foil substrate and (B) Ni foam substrate.

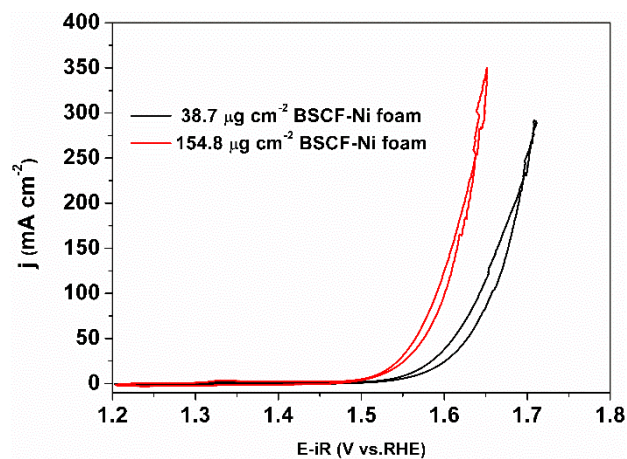

**fig. S15. OER activity for the 38.7 and 154.8  $\mu\text{g cm}^{-2}$  BSCF-Ni foam heterostructure electrodes in a 1.0 M KOH solution.**

The onset potential of 154.8  $\mu\text{g cm}^{-2}$  BSCF-Ni foam is about 1.46 V. An overpotential of  $\sim 0.29$  V is required to obtain 10  $\text{mA cm}^{-2}$ . The onset potential is 1.49 V and the overpotential to obtain 10  $\text{mA cm}^{-2}$  is 0.34 V for 38.7  $\mu\text{g cm}^{-2}$  BSCF-Ni foam.

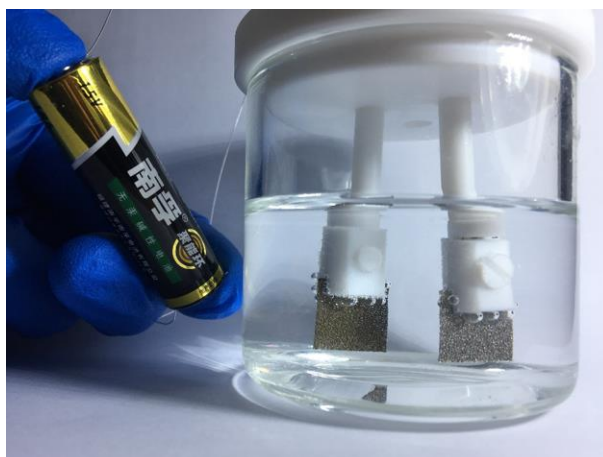

**fig. S16. Photograph of a water-splitting device.** Demonstration of a water-splitting device powered by an AA battery with a nominal voltage of  $\approx 1.5$  V.

**table S1. Comparison of the mass activities of the thin-film heterostructures to other recently reported catalysts for the OER in an alkaline solution.**

| Samples                                              | Loading ( $\mu\text{g cm}^{-2}$ ) | Mass activity ( $\text{mA mg}^{-1}$ ) | Overpotential (V) | Electrolyte | Reference |
|------------------------------------------------------|-----------------------------------|---------------------------------------|-------------------|-------------|-----------|
| <b>r-IrO<sub>2</sub></b>                             | 50                                | ~115                                  | ~0.38             | 0.1 M KOH   | 22        |
| <b>SNCF</b>                                          | 232                               | 43                                    | 0.5               | 0.1 M KOH   | 23        |
| <b>BSCF</b>                                          | 232                               | 37                                    | 0.5               | 0.1 M KOH   | 23        |
| <b>SCFSn(721)</b>                                    | 232                               | 85                                    | 0.45              | 0.1 M KOH   | 33        |
| <b>LCF0.2</b>                                        | 232                               | 52                                    | 0.35              | 0.1 M KOH   | 30        |
| <b>LCO(80 nm)</b>                                    | 250                               | ~40                                   | 0.49              | 0.1 M KOH   | 34        |
| <b>Co<sub>3</sub>O<sub>4</sub>@CoO SC</b>            | 25                                | 234                                   | 0.4               | 0.1 M KOH   | 35        |
| <b>Ni<sub>0.9</sub>Fe<sub>0.1</sub>O<sub>x</sub></b> | 1.2                               | 1065                                  | 0.3               | 1.0 M KOH   | 36        |
| <b>RuO<sub>2</sub>/defective CeO<sub>2</sub></b>     | 360                               | ~52                                   | 0.4               | 0.1 M KOH   | 37        |
| <b><math>\gamma</math>-CoOOH nanosheets</b>          | 150                               | 66.6                                  | 0.3               | 1.0 M KOH   | 38        |
| <b><math>\gamma</math>-CoOOH bulk</b>                | 150                               | 3.4                                   | 0.3               | 1.0 M KOH   | 38        |
| <b>Ca<sub>2</sub>Mn<sub>2</sub>O<sub>5</sub></b>     | 255                               | 30                                    | 0.4               | 0.1 M KOH   | 39        |
| <b>IrO<sub>2</sub></b>                               | 116                               | 86                                    | 0.5               | 0.1 M KOH   | This work |
| <b>1 nm BSCF-Ni</b>                                  | 1.4                               | 9006                                  | 0.5               | 0.1 M KOH   | This work |
| <b>5 nm BSCF-Ni</b>                                  | 8.4                               | 1631                                  | 0.5               | 0.1 M KOH   | This work |
| <b>10 nm BSCF-Ni</b>                                 | 16.8                              | 1517                                  | 0.5               | 0.1 M KOH   | This work |
| <b>15 nm BSCF-Ni</b>                                 | 23.6                              | 655                                   | 0.5               | 0.1 M KOH   | This work |
| <b>20 nm BSCF-Ni</b>                                 | 38.7                              | 271                                   | 0.5               | 0.1 M KOH   | This work |
| <b>20 nm BSCF-Ni foam</b>                            | 38.7                              | 625                                   | 0.5               | 0.1 M KOH   | This work |

Note: Overpotential is defined relative to the thermodynamic potential for water splitting reaction of 1.23 V versus reversible hydrogen electrode (RHE).

The mass activity of 1 nm BSCF-Ni is 252 mA mg<sup>-1</sup> at an overpotential of 0.38 V, which is still more than 2 times that of the state-of-the-art IrO<sub>2</sub> nanoparticles (r-IrO<sub>2</sub> in Table S1, Ref 22).

To rule out the possible contribution of OER activity from the underlying Ni substrate (such as in the case of incomplete coverage of nanofilm on top of the substrate when pinholes or defects formed), we have subtracted the current density of the Ni substrate from the current density of the 1 nm BSCF-Ni sample on the original data (not on the iR-corrected data). At a low overpotential point of 0.5 V, for example, the normalized mass activity of the 1 nm BSCF-Ni nanofilm was 5078 mA mg<sup>-1</sup>, which is still 178 times higher than that of the crystalline BSCF powder.

**table S2. Comparison of the overpotentials to obtain  $10 \text{ mA cm}^{-2}_{\text{film}}$  for the ITO-based heterostructures and the Ni foil-based heterostructures.**

| ITO-based samples | Overpotential (V) | Ni foil-based samples | Overpotential (V) calibrated to single face | Overpotential (V) calibrated to double faces |
|-------------------|-------------------|-----------------------|---------------------------------------------|----------------------------------------------|
| 1 nm              | 0.54              | 1 nm                  | 0.49                                        | 0.52                                         |
| 2 nm              | 0.50              | 5 nm                  | 0.49                                        | 0.52                                         |
| 5 nm              | 0.54              | 10 nm                 | 0.46                                        | 0.49                                         |
| 10 nm             | 0.52              | 15 nm                 | 0.48                                        | 0.51                                         |
| 15 nm             | 0.56              | 20 nm                 | 0.50                                        | 0.54                                         |

The overpotential of the Ni foil-based heterostructures was substantially lower than those exhibited by the ITO-based samples at an identical mass loading (not including the 2 nm BSCF-ITO heterostructure). The intrinsic activity of the Ni foil-based heterostructures was still higher even after normalization by the two opposing geometric areas of the Ni foil.

**table S3. Comparison of the performance of the water-splitting catalysts in a 1.0 M KOH solution.**

| Anode                                   | Cathode                                              | Loading ( $\mu\text{g cm}^{-2}$ ) | Onset potential (V) | Potential difference (V) @ $10 \text{ mA cm}^{-2}$ | Reference |
|-----------------------------------------|------------------------------------------------------|-----------------------------------|---------------------|----------------------------------------------------|-----------|
| Co-P                                    | Co-P                                                 | 3710                              | 1.56                | n.a.                                               | 40        |
| IrO <sub>2</sub>                        | Pt/C                                                 | 1000                              | 1.47                | n.a.                                               | 40        |
| Ni/NiP                                  | Ni/NiP                                               | 10580                             | 1.50                | 1.61                                               | 41        |
| Ni/IrO <sub>2</sub>                     | Ni/Pt/C                                              | 11000                             | >1.50               | >1.61                                              | 41        |
| NiCo <sub>2</sub> O <sub>4</sub>        | Ni <sub>0.33</sub> Co <sub>0.67</sub> S <sub>2</sub> | 300                               | 1.60                | n.a.                                               | 42        |
| NiSe/NF                                 | NiSe/NF                                              | 2800                              | n.a.                | 1.63                                               | 43        |
| Pt/NF                                   | Pt/NF                                                | 2800                              | n.a.                | 1.67                                               | 43        |
| CP/CTs/Co-S                             | CP/CTs/Co-S                                          | 320                               | n.a.                | 1.74                                               | 44        |
| RuO <sub>2</sub>                        | Pt/C                                                 | 320                               | n.a.                | 1.68                                               | 44        |
| EG/Co <sub>0.85</sub> Se/NiFe-LDH       | EG/Co <sub>0.85</sub> Se/NiFe-LDH                    | 4000                              | n.a.                | 1.66                                               | 45        |
| Ir/C                                    | Pt/C                                                 | 4000                              | n.a.                | 1.62                                               | 45        |
| Ni <sub>5</sub> P <sub>4</sub> Films/Ni | Ni <sub>5</sub> P <sub>4</sub> Films/Ni              | 3500                              | n.a.                | <1.70                                              | 46        |
| Pt                                      | Pt                                                   | n.a.                              | n.a.                | >1.80                                              | 46        |
| SNCF-NR                                 | SNCF-NR                                              | 3000                              | ~1.55               | 1.68                                               | 47        |
| IrO <sub>2</sub>                        | Pt/C                                                 | 3000                              | ~1.47               | 1.55                                               | 47        |
| 20 nm BSCF-Ni foam                      | 10 nm Pt-Ni foam                                     | 38.7                              | 1.50                | 1.62                                               | This work |
| 4*20 nm BSCF-Ni foam                    | 4*10 nm Pt-Ni foam                                   | 154.8                             | 1.44                | 1.57                                               | This work |

**movie S1. Video of a water-splitting device.**
